# Supplementary material for: Nickel phosphide: the effect of phosphorus content on hydrogen evolution activity and corrosion resistance in acidic medium
Source: Royal Society of Chemistry journal article supplement (doi:10.1039/c4ta03468f), 2014-01-01
Supplement: c4ta03468f1.pdf [file c4ta03468f1.pdf]

## Supporting information

### Calculation of TOF for NiP catalysts

Calculation of turn over frequencies utilised the surface areas of the catalysts determined by BET and the assumption that each Nitrogen molecule covers 0.162 nm<sup>2</sup>. Both Ni and P sites are considered, and hence each N<sub>2</sub> molecule is assumed to cover two sites. The turnover numbers were calculated as follows.

| Material                        | Density / g cm <sup>-3</sup> | Molar mass / g mol <sup>-1</sup> | Molar volume / cm <sup>3</sup> mol <sup>-1</sup> | Surface site density / cm <sup>-3</sup> |
|---------------------------------|------------------------------|----------------------------------|--------------------------------------------------|-----------------------------------------|
| Ni <sub>2</sub> P               | 7.35                         | 148.36                           | 20.19                                            | 2.00x10 <sup>15</sup>                   |
| Ni <sub>12</sub> P <sub>5</sub> | 7.53                         | 859.19                           | 114.14                                           | 6.31x10 <sup>14</sup>                   |

### Surface site density

$$\#atoms \text{ in } 1 \text{ cm}^3 = N(\text{atoms in formula}) \times N_A / V_M$$

$$\# \text{ atoms in } 1 \text{ cm}^2 = ((\#atoms)^{1/3})^2 = (\#atoms)^{2/3}$$

### Roughness Factor of electrode

$$R_f \left( \frac{\text{cm}^2}{\text{cm}^2} \right) = \text{Loading} \left( \frac{\text{mg}}{\text{cm}^2} \right) \times 0.001 \left( \frac{\text{g}}{\text{mg}} \right) \times \text{Specific area} \left( \frac{\text{m}^2}{\text{g}} \right) \times 10000 \left( \frac{\text{cm}^2}{\text{m}^2} \right)$$

### Specific current density

$$j_{sp} \left( \frac{\text{mA}}{\text{cm}^2} \right) = j_{obs} \left( \frac{\text{mA}}{\text{cm}^2} \right) R_f \left( \frac{\text{cm}^2}{\text{cm}^2} \right)$$

### Specific molecular production rate

For the reaction  $2\text{H}^+ + 2\text{e}^- \rightarrow \text{H}_2$ ,  $n=2$

$$\text{Prod}_{sp} \left( \frac{\text{molecule}}{\text{cm}^2 \cdot \text{s}} \right) = j_{sp} \left( \frac{\text{mA}}{\text{cm}^2} \right) 0.001 \left( \frac{\text{A}}{\text{mA}} \right) \frac{1}{\text{Faraday}} \left( \frac{1}{\text{C} \cdot \text{mol}^{-1}} \right) \frac{1}{n} (\text{unitless}) N_A \left( \frac{\text{molecule}}{\text{mol}} \right)$$

### Site density per specific area

$$\text{AtomsIncc} \left( \frac{1}{\text{cm}^3} \right) = \frac{N(\text{atoms in formula}) N_A (\text{mol}^{-1})}{V_M (\text{cm}^3 \text{mol}^{-1})}$$

$$\text{Sites}_{sp} \left( \frac{1}{\text{cm}^2} \right) = \left( \text{AtomsIncc} \left( \frac{1}{\text{cm}^3} \right) \right)^{2/3}$$

### Turnover frequency

$$TOF\left(\frac{\text{molecules}}{s}\right) = \frac{Prod_{sp}\left(\frac{\text{molecules}}{cm^2 \cdot s}\right)}{Sites_{sp}\left(\frac{1}{cm^2}\right)}$$

| Catalyst                             | Loading<br>/mg cm <sup>-2</sup> | SA<br>/m <sup>2</sup> g <sup>-1</sup> | Rf   | Site density<br>/cm <sup>-3</sup> | -j <sub>-0.10V,sp</sub><br>/μA cm <sup>-2</sup> | -j <sub>-0.20V,sp</sub><br>/μA cm <sup>-2</sup> | TOF <sub>-0.1V</sub><br>/s <sup>-1</sup> | TOF <sub>-0.2V</sub><br>/s <sup>-1</sup> | Ref       |
|--------------------------------------|---------------------------------|---------------------------------------|------|-----------------------------------|-------------------------------------------------|-------------------------------------------------|------------------------------------------|------------------------------------------|-----------|
| Ni <sub>2</sub> P <sub>as recv</sub> | 0.15                            | 1                                     | 1.5  | 2.00×10 <sup>15</sup>             | 89                                              | 673                                             | 0.140                                    | 1.051                                    | this work |
| Ni <sub>2</sub> P <sub>(6hr)</sub>   | 0.15                            | 1.18                                  | 1.8  | 2.00×10 <sup>15</sup>             | 85                                              | 1110                                            | 0.132                                    | 1.737                                    | this work |
| Ni <sub>2</sub> P <sub>(9hr)</sub>   | 0.15                            | 1.38                                  | 2.1  | 2.00×10 <sup>15</sup>             | 62                                              | 1270                                            | 0.096                                    | 1.975                                    | this work |
| Ni <sub>12</sub> P <sub>5</sub>      | 0.15                            | 16.1                                  | 24.1 | 6.30×10 <sup>14</sup>             | 4                                               | 16                                              | 0.019                                    | 0.081                                    | this work |
| Ni <sub>2</sub> P                    | 1.0                             | 32.8                                  | 328  | 2.00×10 <sup>15</sup>             | 10                                              | 320                                             | 0.015                                    | 0.500                                    | 1         |
| CoP <sup>b</sup>                     | 0.9                             | 59.1                                  | 532  | 2.45×10 <sup>15</sup>             | 48                                              | NR                                              | 0.061                                    | NR                                       | 2         |
| MoS <sup>a</sup>                     | NR                              | NR                                    | 90   | 1.11×10 <sup>15</sup>             | NR                                              | 111                                             | NR                                       | 0.312                                    | 3         |

(a) loading not provided in text, but roughness factor provided in supplementary materials; NR: not reported

Bode plot of Ni<sub>2</sub>P (6hr ball milled) as a function of the applied overpotential. Symbols: Data, line: fit. Frequency range: 100 kHz to 0.2Hz at 10 points/decade. A sinusoidal perturbation of 10 mV<sub>pp</sub> was used.

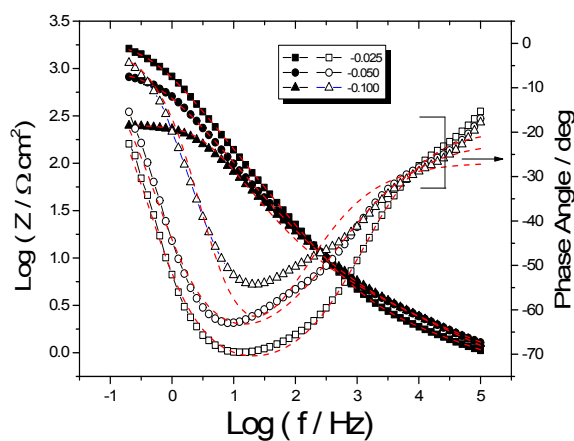

Table giving the equivalent circuit parameters derived using the 2TP model and 2TS model used respectively for Ni<sub>2</sub>P and Ni<sub>12</sub>P<sub>5</sub> based electrodes as a function of the applied overpotential. For Ni<sub>2</sub>P based electrodes, R<sub>s</sub> corresponds to the solution resistance associated with the electrolyte used and R<sub>ct</sub>&CPE<sub>DL</sub> with n<sub>1</sub> and R<sub>2</sub> &CPE<sub>2</sub> with n<sub>2</sub> represent the two time constant associated with the *her* reaction in acidic medium.

| Catalyst                                             | $\eta$<br>/ V<br>vs. RHE | R <sub>s</sub><br>/ $\Omega$ | R <sub>ct</sub><br>/ $\Omega$ cm <sup>2</sup> | R <sub>2</sub><br>/ $\Omega$ cm <sup>2</sup> | CPE <sub>DL</sub><br>/ Fcm <sup>-2</sup> s <sup>n-1</sup>                    | CPE <sub>2</sub><br>/ Fcm <sup>-2</sup> s <sup>n-1</sup>                     | n <sub>DL</sub> | n <sub>2</sub> |
|------------------------------------------------------|--------------------------|------------------------------|-----------------------------------------------|----------------------------------------------|------------------------------------------------------------------------------|------------------------------------------------------------------------------|-----------------|----------------|
| Bulk<br>Ni <sub>2</sub> P                            | -0.1                     | 4.5                          | 1.51E+03                                      | 7.60E+02                                     | 2.33E-11                                                                     | 1.15E-05                                                                     | 0.89            | 1              |
|                                                      | -0.15                    | 4.5                          | 9.09E+02                                      | 2.90E+02                                     | 2.36E-11                                                                     | 2.01E-05                                                                     | 0.7             | 1              |
|                                                      | -0.2                     | 4.5                          | 5.06E+02                                      | 1.97E+02                                     | 2.40E-11                                                                     | 3.13E-05                                                                     | 0.83            | 1              |
|                                                      | -0.25                    | 4.5                          | 3.36E+02                                      | 2.88E+01                                     | 2.36E-11                                                                     | 3.47E-05                                                                     | 0.82            | 1              |
|                                                      | -0.3                     | 4.5                          | 2.17E+02                                      | 2.16E+01                                     | 2.29E-11                                                                     | 7.29E-05                                                                     | 0.81            | 1              |
|                                                      | -0.35                    | 4.5                          | 1.52E+02                                      | 1.16E+01                                     | 2.33E-11                                                                     | 1.39E-04                                                                     | 0.8             | 1              |
| 6 hr ball<br>milled<br>Ni <sub>2</sub> P             | -0.4                     | 4.5                          | 1.28E+02                                      | 6.60E+00                                     | 2.26E-11                                                                     | 2.34E-04                                                                     | 0.8             | 1              |
|                                                      | -0.025                   | 4.5                          | 3.45E+03                                      | 2.53E+03                                     | 1.24E-10                                                                     | 1.32E-06                                                                     | 0.84            | 0.55           |
|                                                      | -0.05                    | 4.5                          | 1.67E+03                                      | 1.19E+03                                     | 1.47E-10                                                                     | 5.00E-06                                                                     | 0.86            | 0.35           |
|                                                      | -0.1                     | 4.5                          | 4.44E+02                                      | 3.47E+02                                     | 1.27E-10                                                                     | 8.68E-06                                                                     | 0.95            | 0.3            |
|                                                      | -0.2                     | 4.5                          | 4.69E+01                                      | 2.38E+02                                     | 1.32E-10                                                                     | 1.63E-05                                                                     | 0.9             | 0.27           |
|                                                      | -0.3                     | 4.5                          | 1.49E+01                                      | 8.50E+01                                     | 1.47E-10                                                                     | 2.35E-05                                                                     | 0.7             | 0.21           |
| 9 hr ball<br>milled<br>Ni <sub>2</sub> P             | -0.4                     | 4.5                          | 9.03E+00                                      | 3.40E+01                                     | 1.32E-10                                                                     | 4.68E-05                                                                     | 0.66            | 0.14           |
|                                                      | -0.1                     | 4.5                          | 6.57E+02                                      | 5.17E+02                                     | 1.59E-10                                                                     | 8.05E-06                                                                     | 0.87            | 0.3            |
|                                                      | -0.15                    | 4.5                          | 2.54E+02                                      | 1.79E+02                                     | 1.43E-10                                                                     | 1.58E-05                                                                     | 0.85            | 0.23           |
|                                                      | -0.2                     | 4.5                          | 4.57E+01                                      | 3.97E+01                                     | 1.64E-10                                                                     | 3.67E-05                                                                     | 0.71            | 0.18           |
|                                                      | -0.3                     | 4.5                          | 1.72E+01                                      | 7.25E+00                                     | 1.61E-10                                                                     | 2.26E-05                                                                     | 0.7             | 0.17           |
|                                                      | -0.35                    | 4.5                          | 1.43E+01                                      | 3.93E+00                                     | 1.64E-10                                                                     | 6.79E-05                                                                     | 0.63            | 0.03           |
| Catalyst                                             | $\eta$<br>/ V<br>vs. RHE | R <sub>s</sub><br>/ $\Omega$ | R <sub>1</sub><br>/ $\Omega$ cm <sup>2</sup>  | R <sub>2</sub><br>/ $\Omega$ cm <sup>2</sup> | CPE <sub>1</sub><br>/ 10 <sup>-3</sup><br>Fcm <sup>-2</sup> s <sup>n-1</sup> | CPE <sub>2</sub><br>/ 10 <sup>-6</sup><br>Fcm <sup>-2</sup> s <sup>n-1</sup> | n <sub>1</sub>  | n <sub>2</sub> |
| Ni <sub>12</sub> P <sub>5</sub><br>(series<br>model) | -0.1                     | 4.5                          | 1.77E+04                                      | 6.25E+02                                     | 8.32E-12                                                                     | 5.64E-06                                                                     | 0.9             | 0.73           |
|                                                      | -0.15                    | 4.5                          | 8.87E+03                                      | 2.32E+02                                     | 4.06E-12                                                                     | 5.70E-06                                                                     | 0.87            | 0.75           |
|                                                      | -0.2                     | 4.5                          | 4.47E+03                                      | 1.16E+02                                     | 1.71E-12                                                                     | 5.75E-06                                                                     | 0.9             | 0.74           |
|                                                      | -0.25                    | 4.5                          | 2.34E+03                                      | 4.59E+01                                     | 7.68E-13                                                                     | 5.72E-06                                                                     | 0.9             | 0.71           |
|                                                      | -0.3                     | 4.5                          | 1.28E+03                                      | 1.93E+01                                     | 4.25E-13                                                                     | 5.66E-06                                                                     | 0.9             | 0.69           |
|                                                      | -0.35                    | 6.5                          | 6.59E+02                                      | 9.66E+00                                     | 4.10E-13                                                                     | 5.78E-06                                                                     | 0.95            | 0.75           |
|                                                      | -0.4                     | 6.1                          | 4.27E+02                                      | 7.25E+00                                     | 3.99E-13                                                                     | 5.72E-06                                                                     | 0.9             | 0.87           |

## References

1. E. J. Popczun, J. R. McKone, C. G. Read, A. J. Biacchi, A. M. Wiltrout, N. S. Lewis and R. E. Schaak, *Journal of the American Chemical Society*, 2013, **135**, 9267-9270.
2. E. J. Popczun, C. G. Read, C. W. Roske, N. S. Lewis and R. E. Schaak, *Angew. Chem.-Int. Edit.*, 2014, **53**, 5427-5430.
3. J. D. Benck, Z. B. Chen, L. Y. Kuritzky, A. J. Forman and T. F. Jaramillo, *ACS Catalysis*, 2012, **2**, 1916-1923.
